# Supplementary material for: Citizen science flow – an assessment of citizen science streamflowmeasurement methods
Source: Copernicus journal article supplement (doi:10.5194/hess-2018-425), 2018-08-21
Supplement: Supplementary file [file hess-2018-425-RC2-supplement.pdf]

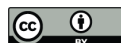

# Citizen science flow - an assessment of citizen science streamflow measurement methods

Jeffrey C. Davids<sup>1,2</sup>, Martine M. Rutten<sup>1</sup>, Anusha Pandey<sup>3</sup>, Nischal Devkota<sup>3</sup>, Wessel David van Oyen<sup>4</sup>, Rajaram Prajapati<sup>3</sup>, and Nick van de Giesen<sup>1</sup>

<sup>1</sup>Water Management, Civil Engineering and Geosciences, Delft University of Technology, TU Delft Building 23, Stevinweg 1, 2628 CN, Delft, Netherlands

<sup>2</sup>SmartPhones4Water-CA, 3881 Benatar Way, Suite G, Chico, CA, 95928, USA

<sup>3</sup>SmartPhones4Water-Nepal, Damodar Marg, Thusikhel, 44600, Lalitpur, Nepal

<sup>4</sup>Engineering and Applied Sciences, Rotterdam University, Rotterdam, G.J. de Jonghweg 4-6, 3015 GG, Rotterdam, Netherlands

Correspondence to: Jeffrey C. Davids ([j.c.davids@tudelft.nl](mailto:j.c.davids@tudelft.nl))

**Abstract.** Wise management of water resources requires data. Nevertheless, the amount of streamflow data being collected globally continues to decline. Involving citizen scientists to generate hydrologic data can potentially help fill this growing hydrological data gap. Our aim herein was to (1) evaluate three potential citizen science streamflow measurement methods (i.e. float, salt dilution, and Bernoulli run-up), (2) select a preferred approach, and (3) pilot test the selected approach at a larger scale. We performed 20 side-by-side evaluation measurements in headwater catchments of the Kathmandu Valley. We used mid-section measurements from an acoustic Doppler velocimeter as reference flows. Evaluated flows ranged from 0.006 to 0.240 m<sup>3</sup> s<sup>-1</sup>. Linear regressions forced through the origin for scatter plots with reference flows had slopes of 1.05, 1.01, and 1.26 with r-squared values of 0.90, 0.98, and 0.61, for float, salt dilution, and Bernoulli run-up methods, respectively. After selecting the salt dilution method as the preferred approach, we performed larger scale pilot testing in a one-week Citizen Science Flow campaign (CS Flow) involving 20 volunteers. Observed flows (n = 145) ranged from 0.0004 to 0.425 m<sup>3</sup> s<sup>-1</sup> and were distributed among the 10 headwater catchments of the Kathmandu Valley. At locations with reference flows available (n = 5), a linear regression forced through the origin between reference flows and CS Flow measurements had a slope of 0.90 with an r-squared value of 0.97. Future work should evaluate the feasibility of applying citizen science salt dilution streamflow measurements to larger regions.

## 1 Introduction

Lord Kelvin, a 19th century Scottish physicist and mathematician, wisely said, "... the first essential step in the direction of learning any subject is to find principles of numerical reckoning and practicable methods for measuring some quality connected with it (Kelvin 1883)." With regards to our natural resources, if we aim to wisely steward them, we must first learn to measure them. While it might sound trivial, collecting and, worse yet, interpreting point measurements of precipitation, evapotranspiration, infiltration, and soil moisture at the catchment scale is fraught with challenges. Indeed, the

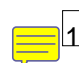

# Summary of comments: davis\_et-al\_hess-2018-425.pdf

---

Page:1

---

 Number: 1 Author: reviewer Subject: Note Date: 2018-09-14 10:49:54

---

I think the first paragraph is a bit philosophical. I would focus more on streamflow and introduce to the problem that large parts of the words still have limited number of gauging stations (especially remote and developing countries) and that measuring devices - while still decreasing in costs - have their limitations.

The following paragraph is well suited as introduction!



importance of measuring streamflow is underpinned by the reality that it is the only truly integrated representation of the entire catchment that we can plainly observe (McCulloch 1996).

Despite growing demand, the amount of streamflow data actually being collected continues to decline in several parts of the world, especially in Africa, Latin America, Asia, and even North America (Hannah et al. 2011; Van de Giesen et al. 2014; Feki et al. 2016; Tauro et al. 2018). Specifically, there is an acute shortage of streamflow data in headwater catchments (Kirchner 2006) and developing regions (Mulligan 2013). The reasons for this trend are various, but the situation is perpetuated by a lack of understanding among policy makers and citizens alike regarding the importance of streamflow data, which leads to persistent funding challenges (Kundzewicz 1997; Pearson 1998). This is further compounded by the reality that the hydrological sciences research community has focused much of its efforts in recent decades on advancing modeling techniques, while innovation in methods for generating the data these models depend on has been relegated to a lower priority (Mishra and Coulibaly 2009).

Considering these challenges, alternative methods for generating streamflow and other hydrological data are being explored (Tauro et al. 2018). For example, developments in using remote sensing to estimate streamflow are being made (Tourian et al. 2013; Durand et al. 2014), but applications in small headwater streams are expected to remain problematic (Tauro et al. 2018). Utilizing cameras for measuring streamflow is also a growing field of research (Muste et al. 2008; Le Coz et al. 2010; Dramais et al. 2011; Le Boursicaud et al. 2016), but it is doubtful that these methods will be broadly applied in headwater catchments in developing regions in the near future because of high costs and lack of technical capacity. In these cases, however, involving citizen scientists to generate hydrologic data can potentially help fill the growing global hydrological data gap (Lowry and Fienen 2012; Buytaert et al. 2014; Sanz et al. 2014; Davids et al. 2017; van Meerveld et al. 2017; Assumpção et al. 2018).

Kruger and Shannon (2000) define citizen science as the process of involving citizens in the scientific process as researchers. Citizen science often uses mobile technology (e.g. smartphones) to obtain georeferenced digital data at many sites, in a manner that has the potential to be easily scaled (O'Grady et al. 2016). Turner and Richter (2011) partnered with citizen scientists to map the presence or absence of flow in ephemeral streams. Fienen and Lowry (2012) showed that citizen science text message based measurements of water level can have acceptable errors. Mazzoleni et al. (2015) showed that flood predictions can be improved by assimilating citizen science water level observations into hydrological models. Le Coz et al. (2016) used citizen scientist photographs to improve the understanding and modeling of flood hazards. Davids et al. (2017) showed that lower frequency observations like those produced by citizen scientists can provide meaningful hydrologic information. Van Meerveld et al. (2017) showed that citizen science observations of stream level class can be informative for deriving model based streamflow time series of ungauged basins.

---

 Number: 1 Author: reviewer Subject: Note Date: 2018-09-14 10:50:51

---

various is rather vague: List some of the reasons!

---

 Number: 2 Author: reviewer Subject: Note Date: 2018-09-14 10:53:02

---

add more recent papers e.g.

Burt & McDonnell (2015): Whither field hydrology ...WRR, (<https://doi.org/10.1002/2014WR016839>)

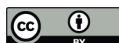

While the previously referenced studies focus mainly on involving citizen scientists for observing stream levels, we were primarily concerned with the possibility of enabling citizen scientists to take direct measurements of streamflow. Using keyword searches using combinations of “citizen science”, “citizen hydrology”, “community monitoring”, “streamflow monitoring”, “streamflow measurements”, and “discharge measurements,” we could not find any specific work about how citizen scientists, equipped with modern tools like smartphones, could take streamflow measurements directly themselves. Instead, to develop potential citizen science streamflow measurement methods to evaluate further, we turned to the vast body of general knowledge about the collection of streamflow data.

Streamflow measurement techniques suggested in the United States Bureau of Reclamation Water Measurement Manual (USBR 2001) that seemed potentially applicable for citizen scientists included: deflection velocity meters consisting of shaped vanes projecting into the flow along with a method to measure deflection; slope area method whereby slope of the water surface in a uniform reach is measured and combined with the Manning formula; and pitot tubes for measuring velocity heads. The float and salt dilution methods described by several authors also seemed applicable (British Standards Institute 1964; Rantz 1982; Fleming and Henkel 2001; Escurra 2004; Moore 2004a, 2004b, and 2005; Herschy 2014). Finally, Wilm and Storey (1944) and Church and Kellerhals (1970) introduced the velocity head rod, or what we later refer to as the Bernoulli run-up method, involving measurement of stream velocity heads with a thin flat plate.

Based on these recommendations, the strengths and limitations discussed in the corresponding literature, and practical considerations about how citizen scientists could implement the different approaches, we selected three approaches for further evaluation: float, salt dilution, and Bernoulli run-up. Our primary aims in this paper were to (1) evaluate these three potential citizen science streamflow measurement methods, (2) select a preferred approach, and (3) pilot test the preferred approach at a larger scale.

## 2 Materials and methods

### 2.1 Citizen science streamflow measurement methods evaluated

The procedures for each of the three citizen science streamflow measurement methods evaluated are described in the following sections.

#### 2.1.1 Float

The float method is based on the velocity-area principle. Total streamflow ( $Q$ ) in cubic meters per second ( $\text{m}^3 \text{s}^{-1}$ ) was calculated with Eq. (1):

$$\text{Eq. (1)} \quad Q = \sum_{i=1}^n C * VF_i * d_i * w_i$$

 Number: 1 Author: reviewer Subject: Note Date: 2018-09-14 11:01:02

---

Maybe the key words were not appropriate to find these solution. There are some smartphone apps available that can do that e.g., <http://www.photrack.ch/dischargeapp.html>  
Please delete the statement and widen your search. There are apps available that can be used widely

 Number: 2 Author: reviewer Subject: Note Date: 2018-09-14 11:08:32

---

I think it would be good to better describe how citizen science can be one possible way to close the data gap but also mention difficulties!

 Number: 3 Author: reviewer Subject: Note Date: 2018-09-14 11:07:32

---

the description of the methods could be more detailed

 Number: 4 Author: reviewer Subject: Note Date: 2018-09-14 11:04:30

---

Add citations that have used this method would add to the introduction)

 Number: 5 Author: reviewer Subject: Note Date: 2018-09-14 11:05:15

---

.. cross-section area and the ...

 Number: 6 Author: reviewer Subject: Note Date: 2018-09-14 11:06:11

---

explain the reader how the salt dilution method works in 1/2 or 1 senses like you did for the other methods

 Number: 7 Author: reviewer Subject: Note Date: 2018-09-14 11:10:24

---

You should summarize the pros and cons and limitations of these methods for the reader. This is important also for you to argue, why you chose the three ones for this study! Otherwise this choice is subjective.

You could add a table with the pros and cons of each method and citations.

 Number: 8 Author: reviewer Subject: Note Date: 2018-09-14 17:44:41

---

I could imagine to present the following information in the introduction section (and include the Manning-Strickler Method as another method (that you later decided not to use) because the way you present it is an introduction to these methods. In the method section you could then more describe the experimental setup how you tested these methods for their suitability for CS.

 Number: 9 Author: reviewer Subject: Note Date: 2018-09-14 11:24:10

---

I think this sentence is not necessary and can be skipped

 Number: 10 Author: reviewer Subject: Replace Date: 2018-09-14 11:33:59

---

Float Method

 Number: 11 Author: reviewer Subject: Note Date: 2018-09-14 11:33:44

---

Start with a description how the method works in general. You measure cross section (subdividing it into n-sub-sections) and flow velocity and then apply coefficients for accounting for friction losses

 Number: 12 Author: reviewer Subject: Replace Date: 2018-09-14 11:30:47

---

is

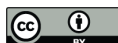

where  $C$  is a unitless coefficient to account for the fact that surface velocity is typically higher than average velocity (typically in the range of 0.66 to 0.80 depending on depth; USBR 2001),  $VF_i$  is surface velocity from float in meters per second ( $\text{m s}^{-1}$ ),  $d_i$  is depth (m), and  $w_i$  is width (m) of each sub-section ( $i = 1$  to  $n$ , where  $n$  is the number of stations).

5 Surface velocity for each sub-section was determined by measuring the amount of time it takes for a floating object to move a certain distance. For floats we used sticks found on site. Sticks are widely available (i.e. easiest for citizen scientists), generally float (except for the densest varieties of wood), and depending on their density are between 40 and 80% submerged, which minimizes wind effects.

10 Float measurements involved the following steps:

1. Selected stream reach with straight and uniform flow
2. Divided cross section into several sub-sections ( $n$ , typically between 5 and 20)
3. For each section, measured and recorded

- 15
  - a. The depth in the middle of the sub-section
  - b. The width of the sub-section
  - c. The time it takes a floating object to move a known distance downstream (typically 1 or 2 m) in the middle of the sub-section
4. Solved for streamflow ( $Q$ ) with Eq. (1)

## 20 2.1.2 Salt dilution

There are two basic types of salt dilution flow measurements: slug (previously known as instantaneous) and continuous rate (Moore 2004a). Salt dilution measurements are based on the principle of the conservation of mass. In the case of the slug method, a single known volume of high concentration salt solution is introduced to a stream and the electrical conductivity (EC) is measured over time at a location sufficiently downstream to allow good mixing (Moore 2005). In contrast, continuous rate salt dilution method involves introducing a known flow rate of salt solution into a stream (Moore 2004b). Slug method salt dilution measurements are broadly applicable in streams with flows up to  $10 \text{ m}^3 \text{ s}^{-1}$  with steep gradients and low background EC levels (Moore 2005). For the sake of citizen scientist repeatability, we chose to only investigate the slug method, because of the added complexity of measuring the flow rate of the salt solution for the continuous rate method.

30 Streamflow ( $Q$ ;  $\text{m}^3 \text{ s}^{-1}$ ) was solved for using Eq. (2) (Rantz 1982; Moore 2005):

$$\text{Eq. (2)} \quad Q = \frac{V}{k \sum_{i=1}^n (EC(t) - EC_{BG}) \Delta t}$$

---

 Number: 1 Author: reviewer Subject: Replace Date: 2018-09-14 11:30:40

---

is

 Number: 2 Author: reviewer Subject: Note Date: 2018-09-14 11:32:41

Mention the difference between surface flow velocity and velocity at dept and flow velocity neat the banks and the middle of the stream.  
Mention also the difficulty that the float can get stuck.

 Number: 3 Author: reviewer Subject: Note Date: 2018-09-14 11:35:10

mention also how EC values are than translated into discharge!

 Number: 4 Author: reviewer Subject: Note Date: 2018-09-14 11:35:52

Mention limitations of the salt dilution method

 Number: 5 Author: reviewer Subject: Note Date: 2018-09-14 11:43:00

It is more common to express the equation in terms of concentrations mot EC!





where  $V$  is the total volume of tracer introduced into the stream ( $\text{m}^3$ ),  $k$  is the calibration constant in centimeters per microsiemens ( $\text{cm } \mu\text{S}^{-1}$ ),  $n$  is the number of measurements taken during the breakthrough curve (unitless),  $\text{EC}(t)$  is the EC at time  $t$  ( $\mu\text{S cm}^{-1}$ ),  $\text{EC}_{\text{BG}}$  is the background EC ( $\mu\text{S cm}^{-1}$ ), and  $\Delta t$  is the change in time between EC measurements (s).

5

We performed the following steps when making a salt dilution measurement:

1. Selected stream reach with turbulence to facilitate vertical and horizontal mixing
2. Determined upstream point for introducing the salt solution and a downstream point for measuring EC
  - a. A rule of thumb in the literature is to separate these locations roughly 25 stream widths apart (Day 1977; Butterworth et al. 2000; Moore 2005)
3. Estimated flow rate visually by estimated width, average depth, and average velocity
4. Prepared salt solution based on the following guidelines (adapted from Moore 2005)
  - a. 10000 ml of stream water for every  $1 \text{ m}^3 \text{ s}^{-1}$  of estimated streamflow
  - b. 1667 g of salt for every  $1 \text{ m}^3 \text{ s}^{-1}$  of estimated streamflow
  - c. Thoroughly mix salt and water until all salt is dissolved
  - d. Following these guidelines ensured a homogenous salt solution with 1 to 6 salt to water ratio by mass
5. Performed dilution test (Moore 2004b) to determine calibration constant ( $k$ ) relating changes in EC values in micro Siemens per centimeter ( $\mu\text{S cm}^{-1}$ ) in the stream to relative concentration of introduced salt solution (RC)
  - a. Made diluted secondary solution by mixing 500 ml of stream water and 5 ml of salt solution
  - b. Measured background stream water EC ( $\text{EC}_{\text{BG}}$ )
  - c. Added known volume (typically 1 or 2 milliliters (ml)) of secondary solution to 500 ml of stream water in dilution cylinder
  - d. Measured new dilution cylinder EC
  - e. Repeated steps 5.c and 5.d until the full range of expected EC values were observed
  - f. Calculated RC for each measurement point
  - g. Plotted EC on the horizontal axis and RC on the vertical axis
  - h. Performed linear regression
  - i. Obtained  $k$  from the slope of the linear regression
6. Dumped salt solution at upstream location
7. Measured EC at downstream location during salinity breakthrough until EC returns to  $\text{EC}_{\text{BG}}$ 
  - a. Recorded a video of the EC meter screen at the downstream location and later digitized the values using the time from the video and the EC values from the meter
8. Solved for streamflow ( $Q$ ) with Eq. (2)

---

 Number: 1 Author: reviewer Subject: Note Date: 2018-09-14 11:43:54

---

I would use present tense for the method description

 Number: 2 Author: reviewer Subject: Replace Date: 2018-09-14 11:49:16

---

Establish the calibration curve relating EC values to actual salt concentrations (Moore 2004b) ...



### 2.1.3 Bernoulli run-up

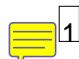

Similar to the float method, Bernoulli run-up (or Bernoulli) is based on the velocity-area principle. Total streamflow ( $Q$ ;  $\text{m}^3 \text{s}^{-1}$ ) was calculated with Eq. (3):

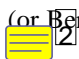

Eq. (3)  $Q = \sum_{i=1}^n VB_i * d1_i$

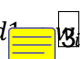

where  $VB_i$  is velocity from Bernoulli run-up ( $\text{m s}^{-1}$ ),  $d1_i$  is depth (m), and  $w_i$  is width (m) of each sub-section ( $i = 1$  to  $n$ ). Area for each sub-section is the product of the width and the depth in the middle of each sub-section. Velocity for each sub-section ( $VB_i$ ) was determined by measuring the “run-up” or change in water level on a thin meter stick from when the stick was inserted parallel and then perpendicular to the direction of flow. The basic principle is that “run-up” on a flat plate inserted perpendicular to flow is proportional to velocity based on the solution to Bernoulli’s equation. Velocity ( $VB_i$ ;  $\text{m s}^{-1}$ ) was calculated from Bernoulli’s principle with Eq. (4):

Eq. (4)  $VB_i = \sqrt{2g * (d2_i - d1_i)}$

where  $g$  is the gravitational constant ( $\text{m s}^{-2}$ ) and  $d2_i$  and  $d1_i$  are the water depths (m) when the flat plate was perpendicular and parallel to the direction of flow, respectively.

Bernoulli run-up measurements involved the following steps:

1. Selected constricted stream with elevated velocity to increase the difference between  $d1_i$  and  $d2_i$
2. Divided cross section into several sub-sections ( $n$ , typically between 5 and 20)
3. For each section, measured and recorded
  - a. The depth with a flat plate held perpendicular to flow ( $d2_i$  or the “Run-up” depth)
  - b. The depth with a flat plate held parallel to flow ( $d1_i$  or the actual water depth)
  - c. The width of the sub-section
4. Solved for streamflow ( $Q$ ) with Eq. (3) and Eq. (4)

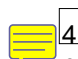

## 2.2 Reference flow

To evaluate the different citizen science flow measurement methods, a reference (or actual) flow for each site was needed. We used a SonTek FlowTracker acoustic Doppler velocimeter (ADV) to determine reference flows. The United States Geological Survey (USGS) mid-section method was used, following guidelines from USGS Water Supply Paper 2175

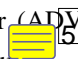

 Number: 1 Author: reviewer Subject: Note Date: 2018-09-14 12:23:15

---

I am not familiar with this method and also the USBR (2001) includes two short paragraphs about this method. Do you use a standardized device for that? What size is the plat you are submerging into the water.

In any case the method is an alternative for estimating/measuring the flow velocity, the rest is the area-flow-velocity method

 Number: 2 Author: reviewer Subject: Note Date: 2018-09-14 12:13:06

---

please give citation

 Number: 3 Author: reviewer Subject: Note Date: 2018-09-14 11:51:20

---

why d1i and not just di?

 Number: 4 Author: reviewer Subject: Note Date: 2018-09-14 12:32:15

---

First you introduce to the various methods used in the sudy! That's fine. Now I would suggest to explain the experimental setup, how you tested the applicability of the methods. (paragrahs below would fit here well)

IMPORTANT: Early in your method section (or as a separate section) describe what type of streams we are looking at in your study. Width, depths, closssection, steepnes, roughness, lamnar, turbulent, sediment transport, etc. This is important to assess whether these methods are appropriate to measure discharge or not!

 Number: 5 Author: reviewer Subject: Note Date: 2018-09-14 12:29:13

---

I assume this device results ina surface flow velocity. What about your cross section? How detailed did you determine it?

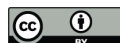

(Rantz 1982), along with instrument specific recommendations from SonTek's FlowTracker manual (SonTek 2009). The FlowTracker ADV has a stated velocity measurement accuracy of within one percent (SonTek 2009). Flow measurement errors, calculated with an International Standards Organization (ISO) approach built into the FlowTracker software, are typically in the range of 3 to 10 %. Reference flow errors in this study are discussed in Section 4.5. A compilation of the measurement reports generated by the FlowTracker ADV are included as supplementary material.

### 2.3 Flow measurement method evaluation and analysis

We first summarized flow measurement method evaluation results in map and tabular form (Fig. 1; Table 1). Measurement ID can be used to link data between the map and table. We used scatter plots to compare reference flow (x-axis) to the three flow measurement methods evaluated (y-axis) to visualize and interpret results from each method. We fitted these points with a linear regression forced through the origin. To understand relative (normalized) errors, we calculated percent differences in relation to reference flow for each method. To better understand possible explanations for observed variability in our results, we performed a correlation analysis. For each method, we performed a Pearson's  $r$  correlation analysis (Lee Rodgers and Nicewander 1988) between the absolute value of percent difference in flow and (1) reference flow, (2) average velocity, (3)  $EC_{BG}$ , and (4) slope. Slope values were developed using elevations from the Google Earth Digital Elevation Model (DEM) obtained along the centreline of the stream alignment both 100 meters upstream and downstream of each measurement point (retrieved July 2nd, 2018). While using DEM data for slope calculations is clearly inferior to performing topographic surveys in the field, this was not possible due to lack of equipment and time; therefore, these slope data are the best available numbers.

### 2.4 Salt dilution calibration coefficient (k) analysis

Arguably, one of the most complicated portions of a salt dilution measurement is performing the dilution test to determine the calibration coefficient  $k$  (Moore 2004b). To determine if the dilution test needs to be repeated for each citizen science measurement, we analyzed all  $k$  values determined during this study. In addition to the mean, range, and standard deviation, we performed a Pearson's  $r$  correlation analysis (Lee Rodgers and Nicewander 1988) to see if  $k$  showed statistically significant trends with latitude, longitude, elevation, and  $EC_{BG}$ .

### 2.5 CS Flow campaign - pilot testing of salt dilution method

Based on the initial results from this study, S4Vital developed an Open Data Kit (ODK; Anokwa et al. 2009) form for citizen scientists to perform salt dilution measurements. The general workflow was (1) selected an appropriate measurement reach with good mixing and minimal bank storage, (2) performed a simplified float measurement (i.e. only a 3 or 4 depths

---

 Number: 1 Author: reviewer Subject: Note Date: 2018-09-14 12:35:54

---

Please mention the spatial resolution of the DEM. How many cells were considered in the 100 up and 100 downstream section to calculate slope?

 Number: 2 Author: reviewer Subject: Note Date: 2018-09-14 12:38:19

---

Do you mean that this calibration is most difficult for citizens to do accurately?

Why are you then trying to correlate it with latitude and longitude, elevation and ECBG? Please explain better!

 Number: 3 Author: reviewer Subject: Note Date: 2018-09-14 12:39:13

---

Do not use abbreviations in a headline and please define CS before!

 Number: 4 Author: reviewer Subject: Note Date: 2018-09-14 12:43:35

---

This is about the experimental setup and would fit better at an earlier spot in the method section.

 Number: 5 Author: reviewer Subject: Note Date: 2018-09-14 13:21:35

---

What is S4W-Nepal! Please introduce earlier so the reader knows it! I assume it is a certain project name!

 Number: 6 Author: reviewer Subject: Note Date: 2018-09-14 12:41:57

---

You have describe the method beforehand. If your procedure is the same as applied by Anokwa et al., 2009 do not repeat it but refer to your description.



and velocities), (3) used the float flow estimate and  $EC_{BG}$  to provide citizen scientists recommended salt/water dose, (4) used pre-weight packets of salt (e.g. 10 g, 20 g, 50 g, 100 g, etc.) to prepare tracer solution, (5) added tracer solution to stream and recorded video of EC breakthrough curve, (6) submitted form to ODK Aggregate server, (6) digitized breakthrough curve (i.e. time and EC) in shared Google Sheet salt dilution flow calculator.

5

During S4W-Nepal's Citizen Science Flow (CS Flow) campaign (15th to 21st of April 2018; Fig. 6), student volunteers from Khwopa College of Engineering were recruited, trained, divided into groups by sub-watershed, and sent to the field to perform salt dilution flow measurements. In the second week, student volunteers used a salt dilution Google Sheet flow calculator to digitize collected measurement data and compute flow (see supplementary material for Excel version).

10 Students analyzed data (third week) and finally presented oral and written summaries of their quality-controlled results. S4W-Nepal currently leverages the enthusiasm and schedule breaks in the academic calendar of young researchers to perform campaigns to improve our pre and post monsoon understanding of stone spouts (Nepali: dhunge dhara), land use, and now streamflow.

15 To analyze the generated streamflow data, we developed a scatter plot between flow estimates from the simplified float method (used to calculate salt dosage) and the salt dilution flow results. At locations where S4W-Nepal takes regular FlowTracker measurements, we compared the most recent S4W-Nepal observation(s) to CS Flow salt dilution measurements. Because salt dilution measurements were performed during the pre-monsoon period when precipitation is minimal, hydrographs are relatively steady with gradual recession over time as the South Asian Monsoon approaches.

20 Therefore, we did not expect differences in time (e.g. plus or minus one month roughly) between the two measurements to greatly impact the resulting comparisons.

### 3 Results

#### 3.1 Summary of evaluation measurements

We performed sets of evaluation measurements at 20 sites within the Kathmandu Valley, Nepal (Fig. 1) at elevations ranging from 1313 to 1905 meters above mean sea level. Flows evaluated ranged from  $0.006$  to  $0.240 \text{ m}^3 \text{ s}^{-1}$  (Table 1; sorted in ascending order by reference flow). Percent differences averaged 7.9, 8.2, and 25.7 % and standard deviations (std dev) of 29.1, 17.2, and 61.9 % were observed for float, salt dilution, and Bernoulli methods, respectively (Table 1). Field notes from Bernoulli flow measurements for two measurements (Msmt IDs 17041903 and 17031102) were destroyed by water damage, so flow and percent difference data were not available. Plots of EC and change in EC as a function of time for all 20 salt dilution measurements are shown in Fig. 2. Additional data for evaluation measurements is included as supplementary material.

 Number: 1 Author: reviewer Subject: Note Date: 2018-09-14 13:22:14

---

You need to introduce to these watershed. How many, were, how big what average flow during the campaign etc. Refer to Fig. 1!!

 Number: 2 Author: reviewer Subject: Note Date: 2018-09-14 12:46:05

---

how long were they trained, was it a theoretical explanation or a hands-on training actually applying the methods themselves under supervision?

 Number: 3 Author: reviewer Subject: Note Date: 2018-09-14 12:47:06

---

Start with this sentence!

 Number: 4 Author: reviewer Subject: Note Date: 2018-09-14 12:48:32

---

Explain more: Where are these stations. Are these the same as the students performed the salt dilution tests. Mark these stations in a map!

 Number: 5 Author: reviewer Subject: Note Date: 2018-09-14 15:54:23

---

One month (!! ) is really long! You need to prove your assumption with statistical data. E.g. mean daily runoff at the gauging stations for each month in the pre-monsoon period and a statistical test, showing that the mean daily discharge is not statistically significantly different!

If you do not have the data to prove this a) consider to skip this part or b) take a dataset of a different gauging station of the region (e.g. operated by a local authority or so) and prove it based on this data.

 Number: 6 Author: reviewer Subject: Insert Text Date: 2018-09-14 13:25:11

---

... a xx km<sup>2</sup> Catchment xx km NW of yyy-city!

 Number: 7 Author: reviewer Subject: Insert Text Date: 2018-09-14 13:26:02

---

Reference flow ...

 Number: 8 Author: reviewer Subject: Note Date: 2018-09-14 13:29:54

---

percent difference to what? I think you mean percent difference between the float method, the salt dilution method and the Bernoulli method relative to the doppler measurements?

 Number: 9 Author: reviewer Subject: Note Date: 2018-09-14 13:30:38

---

exclude them from your data set and from the map



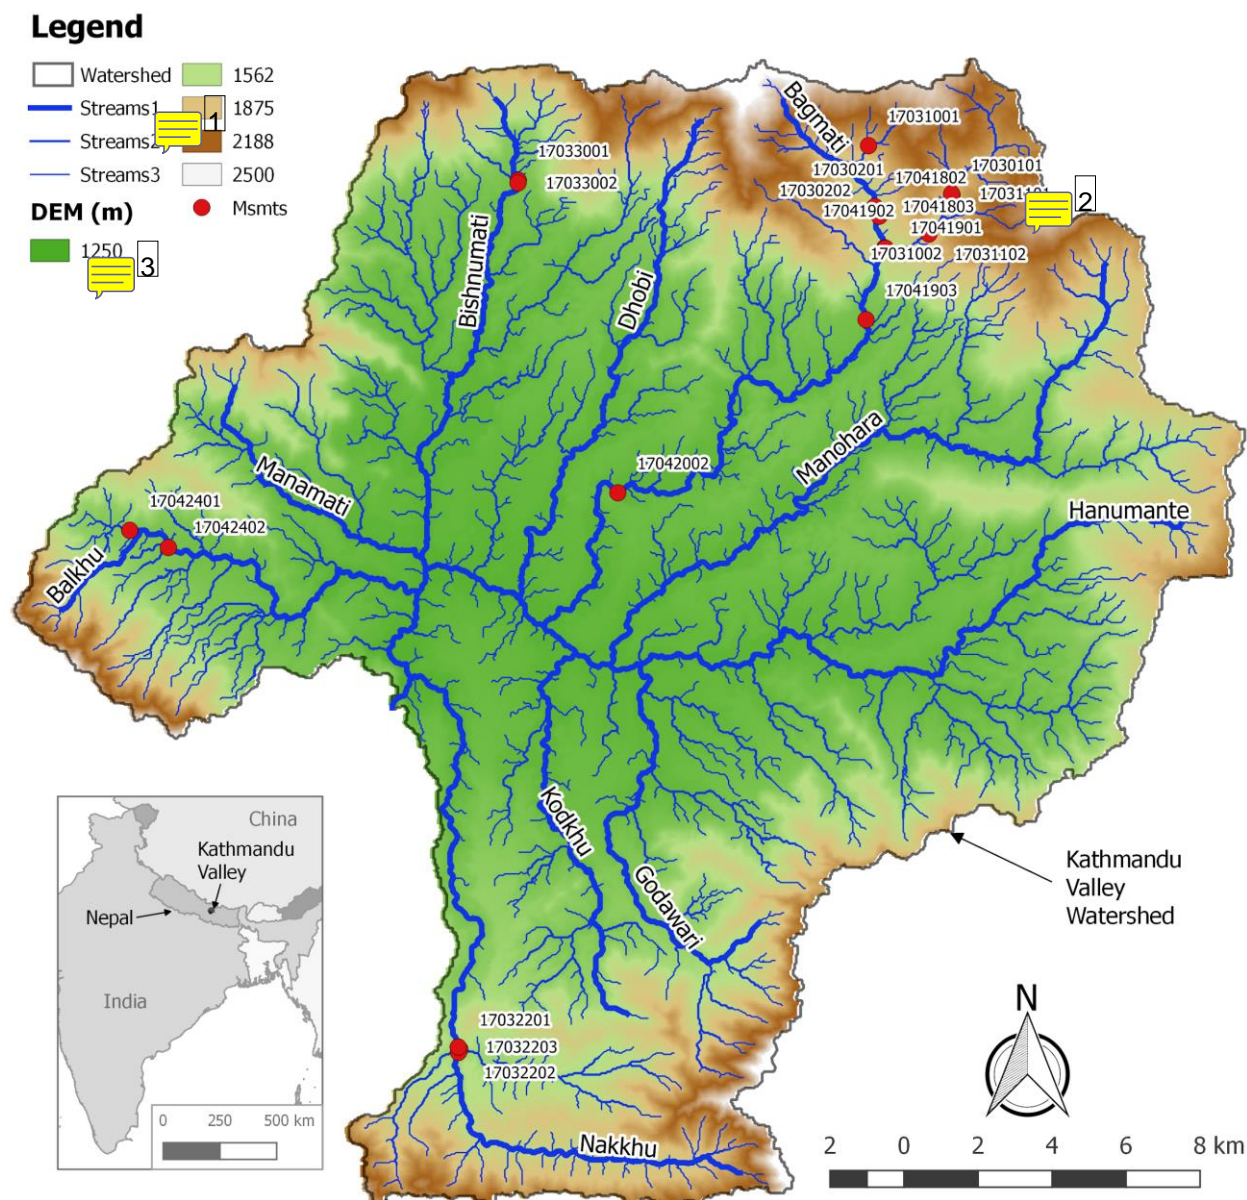

Figure 1: Map figure showing the topography (green to tan to white color gradation) of the Kathmandu Valley from a Shuttle Research Telemetry Mission (SRTM 2000) Digital Elevation Model (DEM), resulting stream network (Davids et al. 2018), and locations of flow measurements (msmts). Measurement points are labelled with measurement ID (msmt\_id). Names of the ten historically perennial tributaries are shown.

---

 Number: 1 Author: reviewer Subject: Note Date: 2018-09-14 13:31:46

---

first order streams ?

 Number: 2 Author: reviewer Subject: Note Date: 2018-09-14 13:37:11

---

the labels partly cover the points.

Even if you (internally used these long digit labels, consider to re-label them by 1 to 20.

 Number: 3 Author: reviewer Subject: Note Date: 2018-09-14 13:33:16

---

do not split the legend for DEM

do not use uneven classbreaks for your colours!

Msmts is explained in the text but not intuitive.



**Table 1: Tabular summary of measurement comparison data. Records sorted in ascending order by reference flow (Q Reference). Latitude and longitude in reference to the WGS84 datum. All flow values shown are shown in  $\text{m}^3 \text{s}^{-1}$  rounded to the thousandth place. Percent differences calculated using Q Reference (FlowTracker) as the actual flow. Data summarized at the bottom with average, minimum (min), maximum (max), and standard deviation (std dev). Note that measurement ID (Msmt ID) is comprised of two digits for year, month, date, and measurement number starting at 01 each day.**

| Msmt ID    | Latitude | Longitude | Elev-<br>ation (m) | Q<br>Reference<br>( $\text{m}^3 \text{s}^{-1}$ ) | Q Float<br>( $\text{m}^3 \text{s}^{-1}$ ) | Q Salt<br>( $\text{m}^3 \text{s}^{-1}$ ) | Q<br>Bernoulli<br>( $\text{m}^3 \text{s}^{-1}$ ) | % Diff-<br>erence<br>Float | % Diff-<br>erence<br>Salt | % Diff-<br>erence<br>Bernoulli |
|------------|----------|-----------|--------------------|--------------------------------------------------|-------------------------------------------|------------------------------------------|--------------------------------------------------|----------------------------|---------------------------|--------------------------------|
| 17030202   | 27.78065 | 85.42426  | 1649               | 0.006                                            | 0.007                                     | 0.006                                    | 0.009                                            | 15.6                       | -12.5                     | 37.5                           |
| 17041802   | 27.78158 | 85.42385  | 1659               | 0.007                                            | 0.008                                     | 0.007                                    | 0.010                                            | 15.9                       | 7.2                       | 44.9                           |
| 17031001   | 27.79649 | 85.42177  | 1905               | 0.011                                            | 0.008                                     | 0.012                                    | 0.009                                            | -28.4                      | 11                        | -19.3                          |
| 17042401   | 27.70026 | 85.22077  | 1406               | 0.017                                            | 0.019                                     | 0.019                                    | 0.018                                            | 11.2                       | 11.2                      | 4.7                            |
| 17032201   | 27.57487 | 85.31314  | 1482               | 0.018                                            | 0.020                                     | 0.024                                    | 0.019                                            | 12.4                       | 37.3                      | 5.1                            |
| 17041901   | 27.77164 | 85.42657  | 1609               | 0.019                                            | 0.028                                     | 0.027                                    | 0.022                                            | 48.4                       | 47.3                      | 16.7                           |
| 17033001   | 27.78691 | 85.32589  | 1364               | 0.021                                            | 0.026                                     | 0.030                                    | 0.048                                            | 27.2                       | 43.2                      | 132                            |
| 17042402   | 27.69620 | 85.23142  | 1382               | 0.023                                            | 0.010                                     | 0.025                                    | 0.006                                            | -59.2                      | 5.2                       | -73                            |
| 17041903   | 27.75406 | 85.42170  | 1355               | 0.034                                            | 0.051                                     | 0.033                                    |                                                  | 51.6                       | -0.9                      |                                |
| 17041902   | 27.77154 | 85.42680  | 1609               | 0.041                                            | 0.041                                     | 0.047                                    | 0.063                                            | 0.5                        | 14.6                      | 53.2                           |
| 17030101   | 27.78483 | 85.44480  | 1877               | 0.104                                            | 0.111                                     | 0.088                                    | 0.102                                            | 6.9                        | -15.9                     | -2.6                           |
| 17032203   | 27.57542 | 85.31268  | 1477               | 0.111                                            | 0.106                                     | 0.120                                    | 0.116                                            | -4.3                       | 8                         | 5.1                            |
| 17032202   | 27.57410 | 85.31277  | 1481               | 0.117                                            | 0.081                                     | 0.126                                    | 0.102                                            | -30.7                      | 8                         | -13.2                          |
| 17033002   | 27.78627 | 85.32583  | 1356               | 0.153                                            | 0.208                                     | 0.144                                    | 0.470                                            | 36.5                       | -5.6                      | 207.9                          |
| 17030201   | 27.78156 | 85.42383  | 1659               | 0.155                                            | 0.248                                     | 0.176                                    | 0.161                                            | 59.3                       | 13.1                      | 3.5                            |
| 17041803   | 27.78168 | 85.42373  | 1663               | 0.156                                            | 0.140                                     | 0.142                                    | 0.210                                            | -10.4                      | -8.9                      | 34.4                           |
| 17031002   | 27.77932 | 85.42496  | 1653               | 0.159                                            | 0.183                                     | 0.155                                    | 0.228                                            | 15.2                       | -2.8                      | 43.4                           |
| 17031101   | 27.78505 | 85.44473  | 1877               | 0.208                                            | 0.221                                     | 0.207                                    | 0.150                                            | 6.5                        | -0.6                      | -27.8                          |
| 17031102   | 27.77514 | 85.43867  | 1806               | 0.230                                            | 0.188                                     | 0.219                                    |                                                  | -18                        | -4.8                      |                                |
| 17042002   | 27.71106 | 85.35432  | 1313               | 0.240                                            | 0.246                                     | 0.264                                    | 0.264                                            | 2.7                        | 10.2                      | 10.1                           |
| average -> |          |           | 1579               | 0.092                                            | 0.098                                     | 0.094                                    | 0.112                                            | 7.9                        | 8.2                       | 25.7                           |
| min ->     |          |           | 1313               | 0.006                                            | 0.007                                     | 0.006                                    | 0.006                                            | -59.2                      | -15.9                     | -73.0                          |
| max ->     |          |           | 1905               | 0.240                                            | 0.248                                     | 0.264                                    | 0.470                                            | 59.3                       | 47.3                      | 207.9                          |
| std dev -> |          |           | 190                | 0.081                                            | 0.089                                     | 0.081                                    | 0.122                                            | 29.1                       | 17.2                      | 61.9                           |

---

 Number: 1 Author: reviewer Subject: Note Date: 2018-09-14 13:42:16

---

Empty cells indicate lost data records

 Number: 2 Author: reviewer Subject: Note Date: 2018-09-14 13:40:12

---

... but 01, 02 03 are not replicates at the same location! Make that clear!

Consider to re-label the msmts from 1 to 20 and give the date in a separate column.

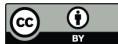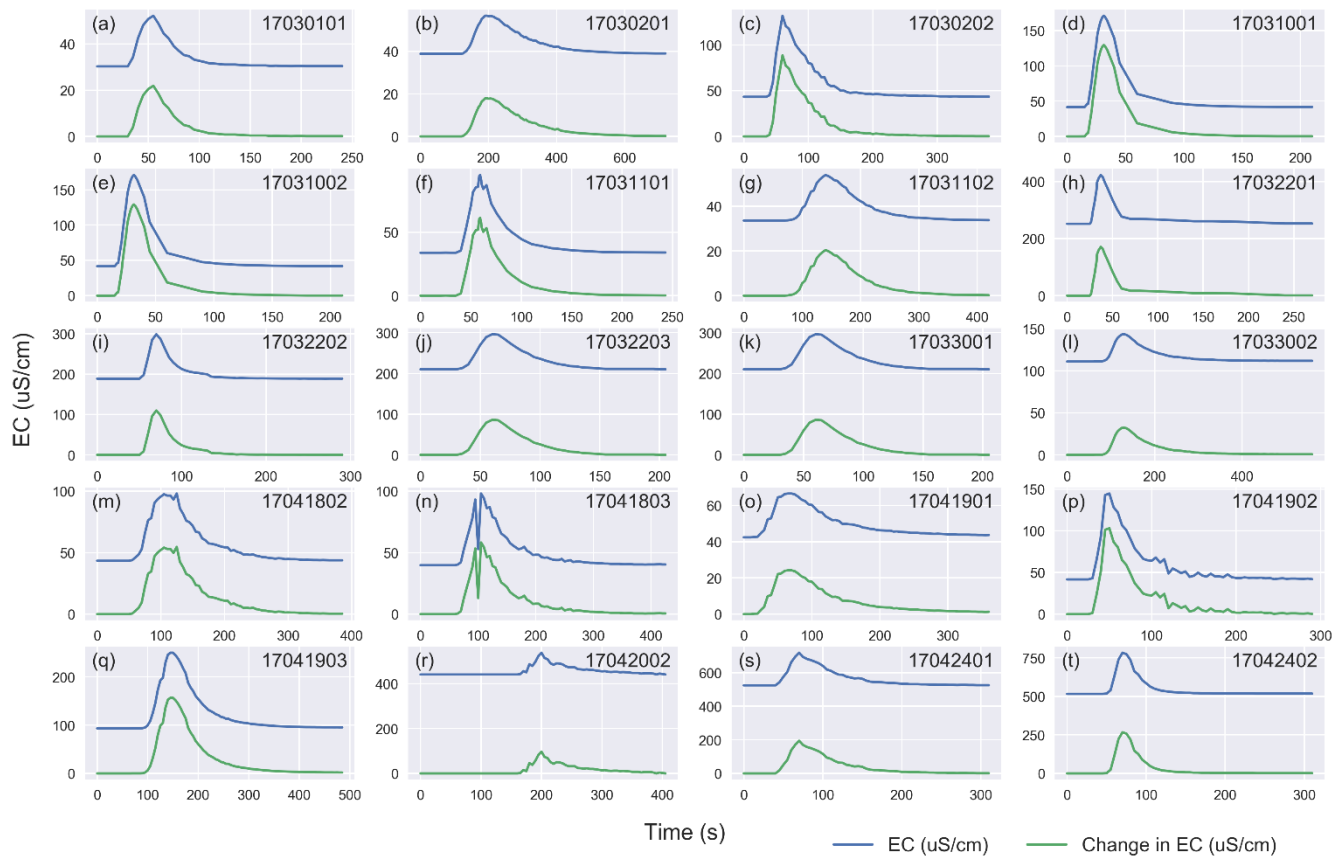

**Figure 2:** Plots of EC ( $\mu\text{S cm}^{-1}$ ; blue trace) and change in EC ( $\mu\text{S cm}^{-1}$ ; green trace) as a function of time (s) for the 20 salt dilution evaluation measures. Measurement ID (Msmt ID; Table 1) shown at the top right of each subplot (i.e. a through t).

## 5 3.2 Flow and calibration coefficient (k) results

### 3.2.1 Flow scatter plots

Scatter plots between reference and observed flows with linear regressions forced through the origin had slopes of 1.05, 1.01, and 1.26 for float, salt dilution, and Bernoulli methods, respectively (Fig. 3). A slope of one represents zero systematic bias, whereas values over one represent positive bias and values less than one represent negative bias. Therefore, for all the methods evaluated we observed different degrees of positive bias. R-squared values were 0.90, 0.98, and 0.61 for float, salt dilution, and Bernoulli methods, respectively (Fig. 3). R-squared values represent the goodness of fit between the regression and the observed data; values closer to one represent a better fit. This can also be seen by the observations for salt dilution plotting closest to the regression line, whereas float and Bernoulli points in general plot farther away from the regression line.

---

 Number: 1 Author: reviewer Subject: Note Date: 2018-09-14 13:46:16

---

What was your intention to show this rather big Figure?

 Number: 2 Author: reviewer Subject: Note Date: 2018-09-14 13:49:30

---

better say: "an over- or under estimation of the estimated discharge relative to the reference discharge.

 Number: 3 Author: reviewer Subject: Replace Date: 2018-09-14 13:48:26

---

>1

 Number: 4 Author: reviewer Subject: Note Date: 2018-09-14 13:52:51

---

Bias would be systematic behaviour of all datapoints shifted up or down. Your regression line indicates a very slight overestimation of the estimated discharge to the reference.

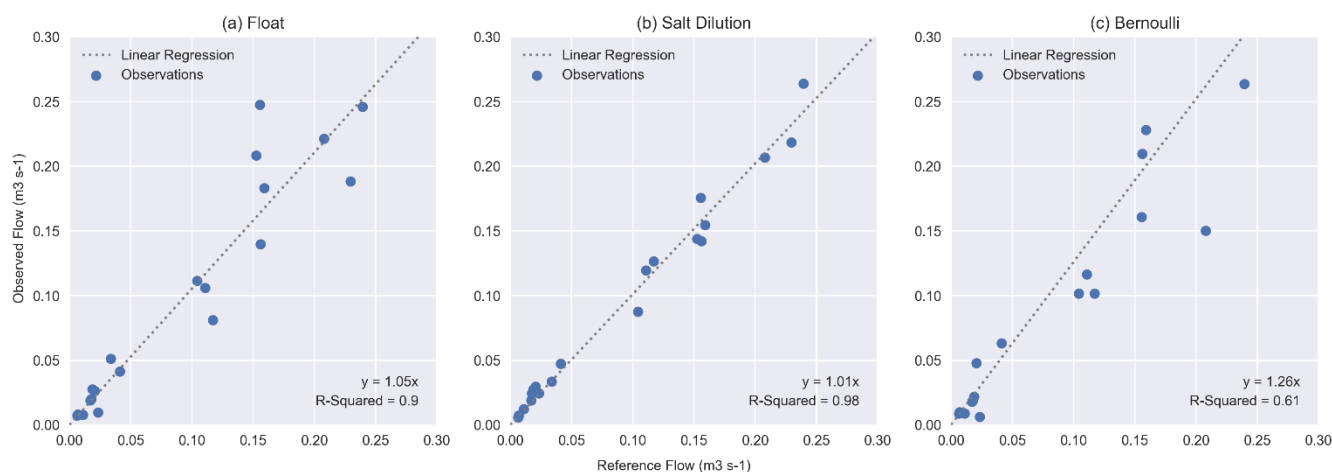

**Figure 3: Scatter plots between reference flow and observed flow for (a) float, (b) salt dilution, and (c) Bernoulli. Note there is one Bernoulli measurement point (17033002) that is outside of the plot space shown (fixed from 0.0 to 0.3 for consistency). Linear regressions and r-squared values shown on the bottom right of each sub-plot.**

### 3.2.2 Flow error correlations

We found statistically significant correlations ( $n = 20$ ,  $p = 0.1$ ) between the absolute value of percent error for float and average velocity (Avg Vel; sub-plot 2;  $r = -0.48$ ) and salt dilution percent error and reference flow (Q Ref; sub-plot 5;  $r = -0.378$ ) (Fig. 4). In both cases, the correlation coefficient was negative, indicating an inverse relationship between the variables. No statistically significant correlations were observed between the remaining pairs of variables.

---

 Number: 1 Author: reviewer Subject: Note Date: 2018-09-14 14:44:28

---

Good you tested the significance! But I suggest to also mention that the functional relation between the variabels is not clear (not linear, not exponential).

 Number: 2 Author: reviewer Subject: Note Date: 2018-09-14 13:55:17

---

Typically alpha would be chosen to 0.05. Please argue in the text why you use 0.1

 Number: 3 Author: reviewer Subject: Note Date: 2018-09-14 14:46:21

---

Attention: Use the Spearman Rank correlation and appropriate non-parametric statistical test for your type of data. The assumptions for Pearson Correlation are not fulfilled

 Number: 4 Author: reviewer Subject: Note Date: 2018-09-14 13:55:49

---

also give p value

 Number: 5 Author: reviewer Subject: Note Date: 2018-09-14 13:55:55

---

also give p value



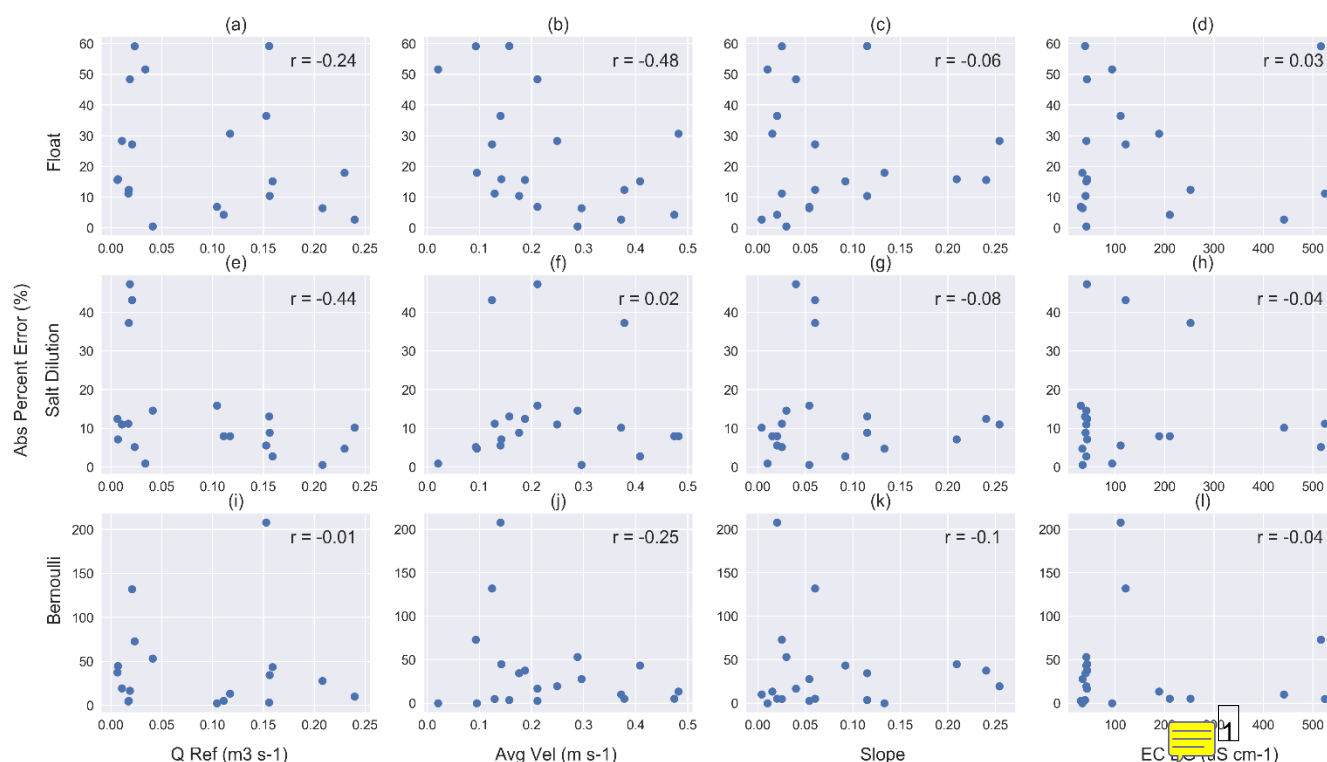

**Figure 4:** Scatter plots between reference flow ( $Q_{Ref}$ ; m<sup>3</sup> s<sup>-1</sup>), average water velocity ( $Avg\ Vel$ ; m s<sup>-1</sup>), slope, and background EC ( $EC_{BG}$ ; µS cm<sup>-1</sup>) and absolute value (Abs) of percent errors for float, salt dilution, and Bernoulli.  $r$  values shown on the upper right of each subplot (i.e. a through l).

5

### 3.2.3 Salt dilution calibration coefficient (k) results

The mean calibration coefficient ( $k$ ) from measurements performed in the field was  $2.81 \times 10^{-6} \pm 2.66 \times 10^{-7}$  (95 % confidence interval;  $n = 10$ , min =  $2.57 \times 10^{-6}$ , max =  $3.05 \times 10^{-6}$ , std dev =  $1.33 \times 10^{-7}$ ). We used mean  $k$  to compute salt dilution flows for the remaining 10 measurements. We found statistically significant correlations ( $n = 10$ ,  $p = 0.1$ ,  $r = 0.549$ ) between the calibration coefficient ( $k$ ) and Longitude ( $r = 0.60$ ) and Elevation ( $r = 0.61$ ; Fig. 5). In both cases, the correlation coefficient was positive, indicating a direct relationship between the variables. No statistically significant correlations were observed between the remaining pairs of variables.

---

 Number: 1 Author: reviewer Subject: Note Date: 2018-09-14 13:56:39

---

please also show p values for the relations

 Number: 2 Author: reviewer Subject: Note Date: 2018-09-14 14:42:41

---

For this type of dataset you need to use the Spearman Rank correlation coefficient and the associated non-parametric statistical test!

 Number: 3 Author: reviewer Subject: Insert Text Date: 2018-09-14 16:41:11

---

th the reference measurements taken by the doppler radar.

 Number: 4 Author: reviewer Subject: Note Date: 2018-09-14 14:51:15

---

what are "remaining measurements"

Strictly  $k$  is site and time specific and needs to be determined for each site and at least once a day!  $k$  is highly sensitive for the outcome of the discharge. Using an average value is not advisable!

If you were forced to do so, clearly state the reasons in the text and indicate the affected values. Also discuss the error you introduced by this procedure.

 Number: 5 Author: reviewer Subject: Note Date: 2018-09-14 14:51:37

---

see my comment on alpha above

 Number: 6 Author: reviewer Subject: Note Date: 2018-09-14 14:55:05

---

please better describe and argue why  $k$  should be a function of latitude and longitude or elevation. I do not understand the physical based rationale. Make clear why you think this is no spurious correlation.

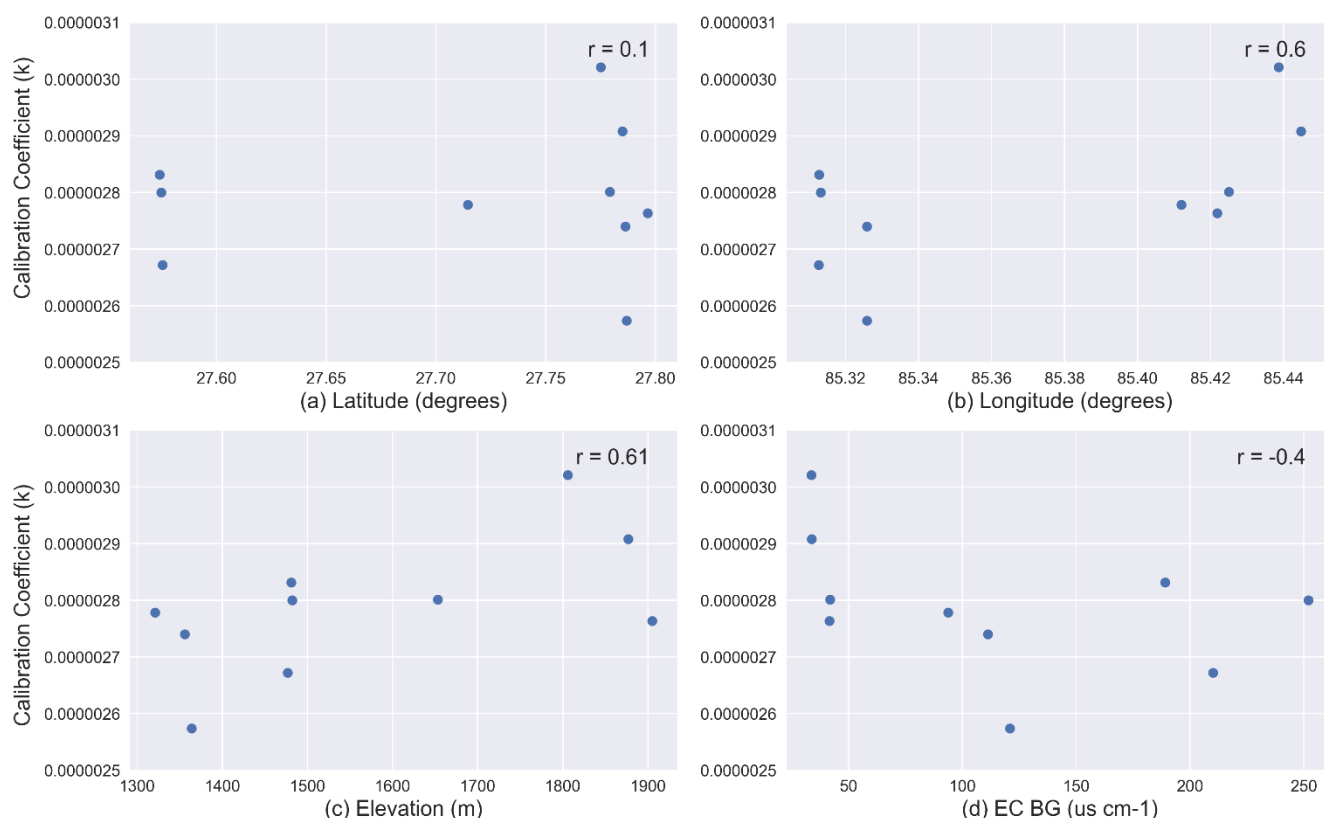

**Figure 5:** Scatter plots between (a) Latitude in degrees, (b) Longitude in degrees, (c) Elevation in meters above mean sea level (m), and (d) background EC in  $\mu\text{S cm}^{-1}$  and the salt dilution calibration coefficient (k). Pearson's r values shown on the upper right of each sub-plot.

5

### 3.3 CS Flow campaign results

From the 15th to the 21st of April 2018, 20 students from Khwopa College of Engineering in Bhaktapur, Nepal joined S4W-Nepal's CS Flow campaign. After 4 hours of training (i.e. two hours classroom and two hours in the field), the student volunteers performed 145 dilution streamflow measurements in the 10 sub-watersheds of the Kathmandu Valley (Fig. 6). Observed flows ranged from 0.0004 to  $0.425 \text{ m}^3 \text{ s}^{-1}$  (a summary of the measurement data is included as supplementary material).

---

 Number: 1 Author: reviewer Subject: Note Date: 2018-09-14 14:57:56

---

This is good information! Copy it to the method section where you describe the experimental setup!

---

 Number: 2 Author: reviewer Subject: Note Date: 2018-09-14 15:00:00

---

It is nit fully crear: The data you presented in Tabl. 1 are done by the authors?

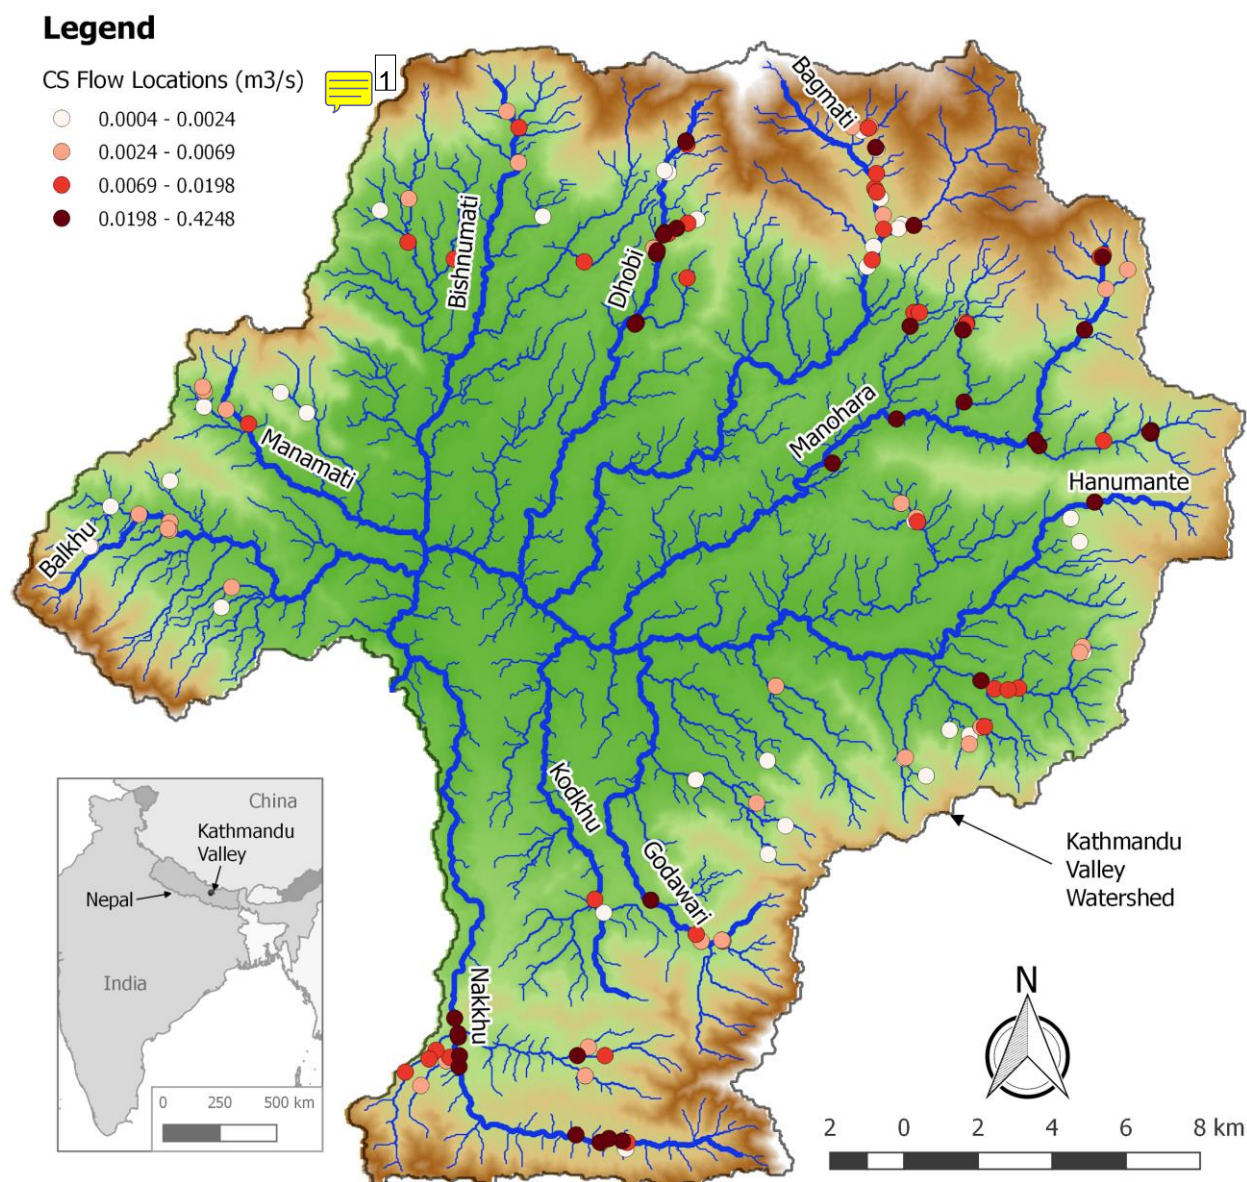

**Figure 6:** CS Flow Campaign measurement locations ( $n = 145$ ) within the Kathmandu Valley. Circular symbol colors are graduated by observed flow rate, categorized by quartile. Larger flows (i.e. darker symbols) were observed on the mainstems (i.e. wider blue lines) of the 10 tributaries of Bishnumati River in the Kathmandu Valley.

5

Scatter plots between flow estimates from the simplified float method (used to calculate salt dosage) and the salt dilution flow results show that systematic differences increase as the observed flow rate decreases (Fig. 7).

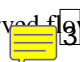

---

 Number: 1 Author: reviewer Subject: Note Date: 2018-09-14 15:01:53

---

consider using even class breaks to GIS pre-determined ones.

 Number: 2 Author: reviewer Subject: Note Date: 2018-09-14 15:02:18

---

Good that you state the categorization method!

 Number: 3 Author: reviewer Subject: Note Date: 2018-09-14 15:39:51

---

to better distinguish between "observed flow" measured with the doppler radar (dataset described before) I would call this here differently. You compare two different estimation methods with each other.

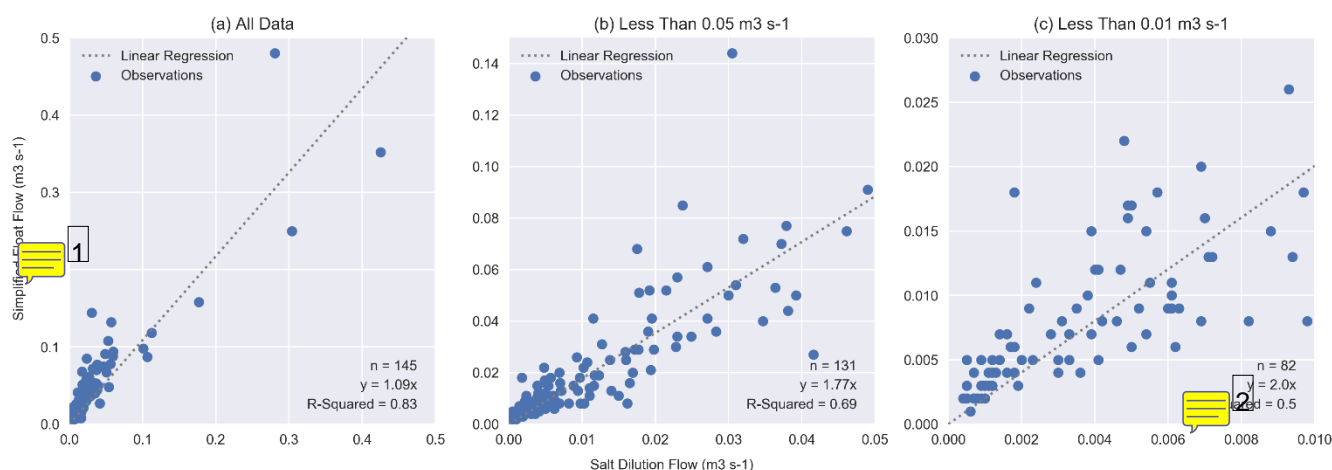

**Figure 7: Scatter plots between salt dilution measurements on the horizontal axis and simplified float estimates on the vertical axis. All data are shown on subplot (a), flows below  $0.05 \text{ m}^3 \text{ s}^{-1}$  are included on subplot (b), and flows below  $0.01 \text{ m}^3 \text{ s}^{-1}$  are shown on subplot (c). A linear fit with corresponding r-squared values are shown. Note that the vertical axis scales for subplots (b) and (c) are fixed at three times the horizontal axis scale to ensure that all data are visible.**

We identified five locations where S4W-Nepal had performed FlowTracker measurements that could be used as reference flows within roughly one month (plus or minus) of the CS Flow salt dilution measurements (Table 2). Comparable flows ranged from  $0.012$  and  $0.111 \text{ m}^3 \text{ s}^{-1}$ . The average error between CS Flow salt dilution and S4W-Nepal FlowTracker measurements was  $-6.3 \%$ , with a standard deviation of  $11.5 \%$ . Linear regression forced through the origin between reference flows and CS Flow measurements had a slope of  $0.90$  with an r-squared value of  $0.97$ .

---

 Number: 1 Author: reviewer Subject: Note Date: 2018-09-14 16:18:18

---

here you call it simplified float flow but in the method you call it float flow. Please be consistent.

 Number: 2 Author: reviewer Subject: Note Date: 2018-09-14 15:34:47

---

please include p-value for all three plots

 Number: 3 Author: reviewer Subject: Note Date: 2018-09-14 15:35:25

---

what is meant with "fixed at three times"?

 Number: 4 Author: reviewer Subject: Note Date: 2018-09-14 15:45:28

---

see my comment in the method section on the validity of this comparison with data +/- one months before/after the CS-campaign.





**Table 2: Comparison between CS Flow salt dilution and S4W-Nepal FlowTracker measurements. Five measurements were identified for evaluation. In one case (i.e. CS Flow Msmt Date 4/16/2018 10:03), a linear interpolation between two S4W-Nepal measurements (i.e. 3/15/2018 7:15 and 5/23/2018 14:23) was made because measurements for both March and May were available. Data summarized at the bottom with average, minimum (min), maximum (max), and standard deviation (std dev).**

| S4W-Nepal SiteID | CS Flow Msmt Date | S4W-Nepal Msmt Date                | CS Flow Salt Dilution Q (m <sup>3</sup> s <sup>-1</sup> ) | S4W-Nepal FlowTracker Reference Q (m <sup>3</sup> s <sup>-1</sup> ) | % Difference |
|------------------|-------------------|------------------------------------|-----------------------------------------------------------|---------------------------------------------------------------------|--------------|
| DB02             | 4/16/2018 10:03   | 3/15/2018 7:15 and 5/23/2018 14:23 | 0.0169                                                    | 0.0492                                                              | 7.5%         |
| BM02             | 4/16/2018 13:22   | 3/15/2018 9:49                     | 0.0169                                                    | 0.0172                                                              | -1.7%        |
| NA02             | 4/18/2018 13:28   | 3/31/2018 4:39                     | 0.0940                                                    | 0.1110                                                              | -15.3%       |
| BA01             | 4/20/2018 11:30   | 3/30/2018 9:24                     | 0.0090                                                    | 0.0118                                                              | -23.7%       |
| NK03             | 4/18/2018 13:57   | 5/16/2018 12:22                    | 0.0461                                                    | 0.0454                                                              | 1.5%         |
| average ->       |                   |                                    | 0.0438                                                    | 0.0469                                                              | -6.3%        |
| min ->           |                   |                                    | 0.0090                                                    | 0.0118                                                              | -23.7%       |
| max ->           |                   |                                    | 0.0940                                                    | 0.1110                                                              | 7.5%         |
| std dev ->       |                   |                                    | 0.0301                                                    | 0.0353                                                              | 11.5%        |

5

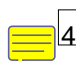

## 4 Discussion

### 4.1 Preferred measurement method

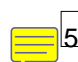

Based on 20 flow measurements performed in this study, we concluded that the salt dilution method will (1) provide the most accurate streamflow data (at least for the range of flows observed), and (2) will be the easiest method for citizen scientists to repeat in the field with limited amounts of training and equipment (see Section 4.4 on citizen scientist repeatability).

While all flow measurement methods evaluated had positive bias, salt dilution showed the closest agreement to the reference flow with an average over estimation of only one percent (based on the linear regression), followed by float and Bernoulli at 5 and 25 %, respectively (Fig. 3). The standard deviation for errors was 17 % for salt dilution, 29 and 62 % for float and Bernoulli, respectively. Additionally, r-squared values indicated that salt dilution had the least amount of variance from the trend line (i.e. closest to one).

Only three salt dilution measurements (i.e. 17032201, 17041901, and 17033001) had percent differences larger than 20 %, and these were all positively biased in relatively small streams (flows between 0.018 and 0.021 m<sup>3</sup> s<sup>-1</sup>). While we can't be certain, we suggest that these errors may be due hyporheic exchanges that removed some salt solution from the measurement

---

 Number: 1 Author: reviewer Subject: Note Date: 2018-09-14 15:47:58

---

You need to give prove that this is a valid procedure!

 Number: 2 Author: reviewer Subject: Note Date: 2018-09-14 16:19:43

---

Is this valeu the average of both measurements? Better sate both values individually to be consistent with all other values.

 Number: 3 Author: reviewer Subject: Note Date: 2018-09-14 15:49:19

---

Please indicate these sites in the maps!

 Number: 4 Author: reviewer Subject: Note Date: 2018-09-14 15:51:38

---

Why not show the agreement between the salt dilution and the Bernoulli method. If the Bernoulli method has not been part of the CS-campaign you need to better describe this in the method section. Right now one would assume all three methods were used in the SC-campaign.

 Number: 5 Author: reviewer Subject: Note Date: 2018-09-14 16:29:51

---

Why not also discuss the other methods and give a suggestion at the end?

 Number: 6 Author: reviewer Subject: Note Date: 2018-09-14 16:20:38

---

see my comment on "bias" above

 Number: 7 Author: reviewer Subject: Note Date: 2018-09-14 16:21:47

---

This reads more like results. Consider to shift this information to the result section.

 Number: 8 Author: reviewer Subject: Note Date: 2018-09-14 16:24:16

---

Give the standard deviation, coefficient of variation or variance to say something about variance.



reach before lateral and vertical mixing could fully occur. In other words, it is possible that some of the salt solution became “underflow” shortly after the injection point and did not return to the surface stream prior to the EC measurement location. As observed, this “removal” of salt solution would lead to a systematic overestimation of flow. If these three measurements are removed, the mean and standard deviation for salt dilution method percent differences become 2 and 9 %, respectively. These percent differences fall within the expected range of uncertainty presented in the literature for salt dilution gauging (Day 1976; USBR 2001; Moore 2004a; Herschy 2014). Excluding these three errors, and assuming errors are normally distributed, we expect that salt dilution measurements will be within roughly  $\pm 18$  % (95 % confidence interval).

## 4.2 Measurement error correlation

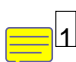

In Fig. 4, three “outlier” percent errors for salt dilution measurements were seen in the middle row of sub-plots (5 through 8) as clusters of three points towards the top of each sub-plot. After removing these points, the Pearson’s  $r$  value decreased to 0.26, and the correlation became statistically insignificant ( $n = 20$ ,  $p = 0.1$ ,  $r > 0.378$ ). Therefore, we are cautious to conclude that error in salt dilution measurements decreases as the amount of streamflow increases. Errors in salt dilution measurements appeared to be uncorrelated with the other variables evaluated (e.g. average velocity, slope, and  $EC_{BG}$ ).

15

The other observed statistically significant correlation was an inverse relationship between average velocity and error in float measurements. Our experience in the field validated that slow moving (and shallow) float velocity measurements were difficult to perform. The combination of turbulence and boundary layer impacts from the streambed and the overlying air mass often made floating objects on the surface travel in non-linear paths, adding uncertainty to distance and time measurements. Challenges with applying the float method in shallow depths was supported USBR (2001) and Escurra (2004), who showed that uncertainty in surface velocity coefficients (i.e. the ratio of surface velocity to actual mean velocity of the underlying water column) increased as depth decreased, especially below 0.3 m.

20

## 4.3 Salt dilution calibration coefficient (k)

Moore (2005) suggests that  $k$  depends on (1) the ratio of salt and water in the tracer solution and (2) the chemical composition of the stream water. To minimize variability in  $k$  due to changes in salt concentration, a fixed ratio of salt to water (e.g. 1 to 6 by mass) should be consistently used to prepare tracer solutions (as it was during this investigation). Significant correlations observed between  $k$  and longitude and elevation may be due to changes in water chemistry that co-vary with these independent variables. Measurements performed in the northeastern portion (i.e. higher longitude) of the Kathmandu Valley were higher in altitude. Geology in the north of the Kathmandu Valley is a mixture of weathered igneous and metamorphic parent material (e.g. gneiss, phyllite, schist, etc.). Geology surrounding measurements in the southwest of the Kathmandu Valley is dominated by sedimentary and slightly metamorphosed deposits of sand, silt, and clay (Shrestha et

30

 Number: 1 Author: reviewer Subject: Note Date: 2018-09-14 16:38:34

---

This section should also mention potential differences in errors when the three different methods are applied by you as experts and by citizens or at least refer to the section you have on CS.

 Number: 2 Author: reviewer Subject: Note Date: 2018-09-14 16:44:58

---

Please also mention the error associated with the Doppler radar as a function of discharge (information provided by the selling company) Also the Doppler radar has its error!

 Number: 3 Author: reviewer Subject: Note Date: 2018-09-14 16:32:43

---

please use the a), b), c), ...to refer to the panels you take about to be clear.

 Number: 4 Author: reviewer Subject: Insert Text Date: 2018-09-14 16:42:43

---

as a function of discharge

 Number: 5 Author: reviewer Subject: Note Date: 2018-09-14 16:33:55

---

I think this is interesting to mention in the result section! As it changes the outcome of your analysis!

 Number: 6 Author: reviewer Subject: Note Date: 2018-09-14 16:47:36

---

Not clear what you are referring to. also Fig 4? But the it is the Absolute percent error of the salt dilution measurement and the doppler radar-based discharge. Please also say Fig 4 xy.

 Number: 7 Author: reviewer Subject: Note Date: 2018-09-14 16:36:45

---

Did you do a float velocity test only once? Typically one can do several estimates and average the values to compensate for the effects you mention. Maybe mention what you did in detail in the method section.

 Number: 8 Author: reviewer Subject: Note Date: 2018-09-14 16:50:08

---

In the first sentence you state the two factors influencing k. Lat and Long are most likely not relevant and meaningful influencing factors, just spurious correlations.



al. 2012). These differences in geology could impact water chemistry through water-rock interactions (Lasaga 1984) and ultimately impact  $k$ . Additional work should focus on improving our understanding of the variables affecting  $k$ . Specifically, spatial variability in  $k$  due to changes in stream water chemistry should be investigated prior to applying the salt dilution methodology described in this paper into other areas.

5

#### 4.4 Citizen scientist repeatability

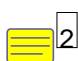

In this context, repeatability refers to the overall likelihood that the measurement method can be successfully repeated by citizen scientists. Along these lines, there were several practical observations in the field worth briefly discussing. While difficult to quantitatively evaluate, we offer the following qualitative observations regarding the selection of a preferred citizen science streamflow measurement method.

10

- **Required training** - Float and salt dilution require similar amount of training, which from our experience we estimate to be roughly four hours, involving both classroom and field time. The amount of training is strongly dependent on the background of the volunteers. Bernoulli requires additional training for how to minimize vertical movement of the metal measurement plate.
- **Cost of equipment** - All methods require a SmartPhone, measuring scale, and measuring tape. Additionally, salt dilution requires an inexpensive EC meter (e.g. [\\$15 HoneForest Water Quality Tester](#)), a graduated cylinder, and a bucket.
- **Number of citizen scientists required** - Teams of at least two citizen scientists are recommended for all methods; teams of three were preferred in our experience.
- **Data recording requirements** - For float and Bernoulli, depth, width, and velocity (including distance and time) data needs to be recorded at multiple locations. Salt dilution only requires some basic data entry and a video of the breakthrough curve.
- **Complexity of procedure** - Float and Bernoulli require detailed transects of the stream. Bernoulli is extremely sensitive to vertical movements in the metal measurement plate. Bernoulli is always very difficult for low velocities.
- **Enjoyability of measurement** - We found that citizen scientists generally enjoyed watching the salt dilution breakthrough curves and found them less repetitive than the tasks associated with float and Bernoulli methods. Bernoulli measurements can be frustrating when trying to keep the metal measurement plate from moving vertically, especially when there is a soft streambed.
- **Safety** - Both float and Bernoulli measurements require citizen scientists to wade through the stream. At certain flow rates this clearly poses a safety risk, especially for people who cannot swim. A clear benefit of the salt dilution

15

20

25

30

---

 Number: 1 Author: reviewer Subject: Note Date: 2018-09-14 16:52:30

---

Different geology effects the background concentration, for sure, but should not effect k.  
Please reconsider the content of this paragraph.

 Number: 2 Author: reviewer Subject: Note Date: 2018-09-14 17:09:13

---

I think this section is useful for the reader.  
For you chosen title I would encourage you to check your data and see if you can use it for additional research questions concerning the Citizen Science aspect.  
E.g. the quality of the measurements could be a function of the person/or group that performed the calibration. Comparing your dataset (n=20) wiht the CS dataset (n=145) you could maby see if experts do "better" than "citizes" or not.

 Number: 3 Author: reviewer Subject: Note Date: 2018-09-14 17:01:26

---

This is an important information you need to mention in the method section. You actually did not have 20 students but 7 teams of 3 persons?



method is that everything but the simplified float estimate can be performed from the stream bank. Note that the results from the simplified float method are only used to determine the salt dosing. If the salt dosing doesn't provide a large enough change in EC to be clearly observed, the measurement can be repeated with a higher flow estimate and corresponding increase in tracer solution.

5

#### 4.5 Uncertainty in reference flows

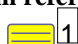

Uncertainty in measurements of reference flow (i.e. actual flow) affected uncertainty in our evaluation of the three flow measurement methods. Based on an ISO discharge uncertainty calculation within the SonTek FlowTracker software, the uncertainties in flow ranged from 2.5 to 6.0 %, with a mean of 3.7 %. Based on the literature (Rantz 1982; Harmel 2006; Herschy 2014), these uncertainties in reference flows are towards the lower end of the expected range for field measurements of streamflow. Therefore, we do not think that any systematic biases or uncertainties in our data change the results of this paper.

10

#### 4.6 Reynolds number

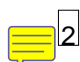

Turbulent mixing of flow is an important aspect of salt dilution flow measurements. Reynolds number is typically used as a quantitative measure of turbulence in fluid flow. In addition to density and viscosity, fluid velocity and a characteristic length are required for calculating Reynolds number. Many of our measurements were performed in mountainous headwater streams with high slopes. To collect the most accurate reference flow measurements, however, we selected the lowest gradient stretch of the stream. The cross sections used for reference flow measurements were typically in the widest and deepest reaches of the stream to ensure the most laminar flow lines for accurate velocity and area measurements. Using velocity and characteristic length data from these reference flow measurement locations to calculate Reynolds number would not have been representative of the actual average Reynolds number of the stream reaches used for the salt dilution measurements. This is because selected stream reaches for salt dilution included steep gradients with lots of mixing, which were often either entirely upstream or downstream of reference flow locations. Therefore, we did not include Reynolds number in the correlation analysis for salt dilution.

20

25

#### 4.7 Flow measurement methods not evaluated

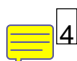

We initially considered including the slope area method (USBR 2001) based on the Manning's equation for evaluation. The concept was to use a long clear flexible tube of a known length (e.g. 20 m) to measure the slope of the water surface using the principle of a water level. The tube was completely submerged and filled with water. The upstream end of the tube remained submerged and the entrance was held perpendicular to flow to ensure that only the pressure head of the stream was

30

---

 Number: 1 Author: reviewer Subject: Note Date: 2018-09-14 17:34:13

---

Ah, here you mention the accuracy of the doppler radar device! Good!

I assume the error is depending on the flow velocity and has a lower and upper range of proper application given by the producer. Please mention this here.

---

 Number: 2 Author: reviewer Subject: Note Date: 2018-09-14 17:45:13

---

maybe union with the section before

---

 Number: 3 Author: reviewer Subject: Note Date: 2018-09-14 17:35:45

---

give range and mean slope you used in brackets

Where this step and pool river beds?

---

 Number: 4 Author: reviewer Subject: Note Date: 2018-09-14 17:45:50

---

move to the other methods that I think would all better fit in the introduction section.





sensed at the tube inlet. The tube was stretched out longitudinally along the stream reach, and the downstream end of the tube was exposed to the atmosphere. The difference in water levels inside the downstream end of the tube and the stream water level immediately outside of the tube <sup>1</sup> measured. This change in head was divided by the total length of the tube to determine the slope of the water surface.

5

Within the first few days of field work, we concluded that this method was not suitable for piloting at the types of sites we were investigating. Because we were particularly interested in high gradient headwater streams, the primary problem was finding a stretch of stream long enough that was flowing at normal depth, without backwater and drops in the water surface caused by sudden changes in channel geometry (both longitudinally and latitudinally). An additional challenge of this method is that uncertainty in flow measurements are linearly proportional to uncertainty in estimations of the roughness coefficient ( $n$ ), and  $n$  is difficult to estimate visually, especially for citizen scientists. Therefore, Manning's method was not included in this investigation. Despite our experience, we suggest that in certain settings with long straight reaches of uniform flow, Manning's may still be an appropriate citizen science flow measurement method. To simplify observations of the change in head, the Manning's method would also benefit from the installation of upstream and downstream staff gauges survey to a common datum. However, this would make the method difficult and costly to implement, and therefore less scalable.

10

15

#### 4.8 CS Flow campaign

The CS Flow Campaign provided us with a unique opportunity to evaluate the preferred salt dilution <sup>2</sup> citizen science streamflow measurement method at a larger scale. In addition to the valuable streamflow data that will help us characterize the hydrological situation in the Kathmandu Valley with greater precision <sup>3</sup> we also learned many practical lessons about how to apply citizen science based streamflow generation methods at a broader scale. Unfortunately, there was no systematic way to evaluate the accuracy of all the measurements performed. However, at the five locations where S4W-Nepal FlowTracker measurements were available, the resulting errors ( $\mu = -6.7\%$ , std dev =  $11.5\%$ ; Table 2) were comparable to our initial evaluation data ( $\mu = 8.2\%$ , std dev =  $17.2\%$ ; Table 1).

20

25

Linear regression forced through the origin between reference flows and salt dilution measurements had slopes of 0.90 and 1.01 with an  $r$ -squared values of 0.97 and 0.98 for CS Flow measurements and our initial evaluation measurements, respectively. Goodness of fit was similar, but while evaluation measurements had a slight positive bias (1 %), CS Flow measurements had a larger negative bias (-10 %). One possible explanation for this is that the three CS Flow comparisons that had negative percent differences (i.e. BM02, NA02, and BA01; Table 2) all used reference flows performed prior to CS Flow measurements. Since hydrographs during this season are gradually receding prior to the onset of the South Asian Monsoon, it is possible that the actual flow of the streams decreased between reference flow and CS Flow observations.

30

<sup>4</sup>

<sup>5</sup>

---

 Number: 1 Author: reviewer Subject: Note Date: 2018-09-14 17:40:27

---

I like your method! Still the section is too long for a method you finally decided to be not practical and did not use in this paper! You could shorten the text and should mention the Manning-Strickler Method as alternative (that you finally not chose) in the Introduction toughest with all other methods.

 Number: 2 Author: reviewer Subject: Note Date: 2018-09-14 17:47:08

---

Ah, you need to stat in the method section that the CS campaign (n + 145) only was on applying salt dilution not all other methods.

 Number: 3 Author: reviewer Subject: Note Date: 2018-09-14 18:01:28

---

You dataset is good and includes a lot of potential. However the campaign needed to be repeated to learn more about the hydrology of the area. You could discuss if this is feasible or not.

 Number: 4 Author: reviewer Subject: Note Date: 2018-09-14 18:09:54

---

see my concern about the reference measurements +/- 1 month befoer/after the CS campain.

 Number: 5 Author: reviewer Subject: Note Date: 2018-09-14 18:11:11

---

If this is the case than you definitely cannot take the dropper radar based discharge as reference for you CS campain!



As flows decreased, we observed a progressively increasing positive bias between simplified float estimates and salt dilution measurements (Fig. 7). This finding is congruent with previous efforts to characterize the dynamic relationship between channel depth and surface velocity coefficients (USBR 2001; Escurra 2004). Average stream depths were often on the order of a few centimeters for the headwater catchments observed. Surface velocity coefficients provided by USBR (2001) range from 0.66 to 0.80 with increasing depths, but are held constant at 0.66 for depths less than 0.3 meters. Our results indicate that for flows less than  $0.01 \text{ m}^3 \text{ s}^{-1}$  a surface velocity coefficient of 0.5 would be more appropriate. The strength of the relationship between salt dilution and float streamflows also deteriorates as flows decrease (i.e. r-squared equals 0.83, 0.69, and 0.50 for plots 1, 2, and 3, respectively). This suggests that surface velocity coefficients are highly variable at low flow rates and correspondingly shallow depths.

## 5 Summary and future work

Our aim in this paper was to (1) evaluate possible citizen science streamflow measurement methods, (2) select a preferred approach, and (3) pilot test the selected method in a real-world setting. We evaluated three different approaches (i.e. float, salt dilution, and Bernoulli run-up) by performing 20 side by side comparison measurements in headwater catchments of the Kathmandu Valley. We used USGS mid-section discharge measurements from a SonTek FlowTracker acoustic Doppler velocimeter as reference flows. Evaluated flows ranged from  $0.006$  to  $0.240 \text{ m}^3 \text{ s}^{-1}$ . Linear regressions forced through the origin for scatter plots with reference flows had slopes of 1.05, 1.01, and 1.26 with r-squared values of 0.90, 0.98, and 0.61, for float, salt dilution, and Bernoulli run-up methods, respectively. The salt dilution method was selected as the preferred approach based on its favourable quantitative results compared to the other methods, and other qualitative factors concerning citizen science repeatability. The approach was then pilot tested in a CS Flow Campaign, which involved 20 volunteers performing 145 measurements, ranging from  $0.0004$  to  $0.425 \text{ m}^3 \text{ s}^{-1}$ , distributed among the 10 headwater catchments of the Kathmandu Valley. While there was no way to evaluate the accuracy of all 145 measurements, five of the measurements were performed in locations where USGS mid-section method discharge measurements had been performed. For these five locations, a linear regression forced through the origin between reference flows and CS Flow measurements had a slope of 0.90 with an r-squared value of 0.97.

Motivated by these promising results, future work should further evaluate the feasibility of applying citizen science based salt dilution streamflow measurements to larger areas of Nepal and beyond. Issues of how to motivate citizen scientists and young researchers (i.e. all science and engineering minded students from primary through graduate school ages) to participate in citizen science streamflow measurement efforts should receive additional attention, especially in the relatively

---

 Number: 1 Author: reviewer Subject: Note Date: 2018-09-14 18:13:23

---

If your flow was in the order of a few cm than standard friction coefficients/correction factors need to be adapted.

---

 Number: 2 Author: reviewer Subject: Note Date: 2018-09-14 18:13:53

---

in terms of what?

---

 Number: 3 Author: reviewer Subject: Note Date: 2018-09-14 18:16:07

---

please mention this relevant information in the method section!! Age, education level etc.)



unexplored context of citizen science in Asia. Finally, the assumption of a constant calibration coefficient ( $k$ ) should be evaluated over a larger sample size covering a broader range of geological and water quality conditions.

## 6 Data availability

- 5 The data used in this paper are provided as supplementary material.

## 7 Author contribution

- Jeffrey C. Davids had the initial idea for this investigation and designed the experiments in collaboration with Martine M. Rutten, Wessel David van Oyen, and Nick van de Giesen. Field work was performed by Jeffrey C. Davids, Anusha Pandey, Nischal Devkota, Wessel David van Oyen, and Rajaram Prajapati. Jeffrey C. Davids prepared the manuscript with valuable  
10 contributions from all co-authors.

## 8 Competing interests

The authors declare that they have no conflict of interest.

## 9 Acknowledgements

- This work was supported by the Swedish International Development Agency under Grant number 2016-05801; and by  
15 SmartPhones4Water (S4W). We appreciate the dedicated efforts of Annette van Loosen, Bhumika Thapa, Sunil Duwal, volunteers from Khwopa College of Engineering, Anurag Gyawali, Anu Grace Rai, Sanam Tamang, Eliyah Moktan, Kristi Davids, and the rest of the S4W-Nepal team. We would also like to thank Dr. Ram Devi Tachamo Shah, Dr. Deep Narayan Shah, Dr. Narendra Man Shakya, and Dr. Steve Lyon for their supervision and support of this work. Finally, a special thanks to SonTek for their donation of a FlowTracker acoustic Doppler velocimeter that was used for the reference flow  
20 measurements discussed in this paper and many more to come.

- This research was performed in the context of a larger citizen science project called SmartPhones4Water or S4W (Davids et al. 2017; Davids et al. 2018; [www.SmartPhones4Water.org](http://www.SmartPhones4Water.org)). S4W focuses on leveraging citizen science, mobile technology, and young researchers to improve lives by strengthening our understanding and management of water. S4W's first pilot  
25 project, S4W-Nepal, initially concentrated on the Kathmandu Valley, and is now expanding into other regions of the country and beyond. All of S4W's efforts, including the research herein, have a focus on simple field data collection methods that

No Comments.



can be standardized and scaled so that young researchers and citizen scientists can help fill data gaps in other data scarce regions.

## 10 References

- Anokwa Y, Hartung C, Brunette W, 2009. Open source data collection in the developing world. *Computer* 42(10):97–99.
- 5 <http://doi.ieeecomputersociety.org/10.1109/MC.2009.328>
- Assumpção, T.H., Popescu, I., Jonoski, A. and Solomatine, D.P., 2018. Citizen observations contributing to flood modelling: opportunities and challenges. *Hydrology and Earth System Sciences*, 22(2), pp.1473-1489.
- 10 British Standards Institute, 1964. Method of Measurement of Liquid Flow in Open Channels British Standards 3680: Part 3.
- Butterworth, J.A., Hewitt, E.J. and McCartney, M.P., 2000. Discharge measurement using portable dilution gauging flowmeters. *Water and Environment Journal*, 14(6), pp.436-441.
- 15 Buytaert, W., Zulkafli, Z., Grainger, S., Acosta, L., Alemie, T.C., Bastiaensen, J., De Bièvre, B., Bhusal, J., Clark, J., Dewulf, A. and Foggin, M., 2014. Citizen science in hydrology and water resources: opportunities for knowledge generation, ecosystem service management, and sustainable development. *Frontiers in Earth Science*, 2, p.26.
- Church, M. and Kellerhals, R., 1970. Stream gauging techniques for remote areas using portable equipment. Technical  
20 Bulletin No. 25, Inland Waters Branch, Department of Energy, Mines, and Resources.
- Davids, J.C., van de Giesen, N. and Rutten, M., 2017. Continuity vs. the crowd—tradeoffs between continuous and intermittent citizen hydrology streamflow observations. *Environmental management*, 60(1), pp.12-29.
- 25 Davids, J.C., Rutten, M.M., Shah, R.D.T., Shah, D.N., Devkota, N., Izeboud, P., Pandey, A. and van de Giesen, N., 2018. Quantifying the connections—linkages between land-use and water in the Kathmandu Valley, Nepal. *Environmental monitoring and assessment*, 190, pp.1-17.
- Day, T.J., 1976. On the precision of salt dilution gauging. *Journal of Hydrology*, 31(3-4), pp.293-306.
- 30 [Day, T.J., 1977. Observed mixing lengths in mountain streams. \*Journal of Hydrology\*, 35\(1977\), pp.125-136.](#)

No Comments.





- Dramais, G., Le Coz, J., Camenen, B. and Hauet, A., 2011. Advantages of a mobile LSPIV method for measuring flood discharges and improving stage–discharge curves. *Journal of Hydro-Environment Research*, 5(4), pp.301-312.
- Durand, M., Neal, J., Rodríguez, E., Andreadis, K.M., Smith, L.C. and Yoon, Y., 2014. Estimating reach-averaged discharge for the River Severn from measurements of river water surface elevation and slope. *Journal of Hydrology*, 511, pp.92-104.
- Escurra, J., 2004. Field Calibration of the Float Method in Open Channels.
- Feki, H., Slimani, M. and Cudennec, C., 2016. Geostatistically based optimization of a rainfall monitoring network extension: case of the climatically heterogeneous Tunisia. *Hydrology Research*, p.nh2016256.
- Fienen, M.N. and Lowry, C.S., 2012. Social. Water—A crowdsourcing tool for environmental data acquisition. *Computers & Geosciences*, 49, pp.164-169.
- Fleming, B. and Henkel, D., 2001. Community-based ecological monitoring: a rapid appraisal approach. *Journal of the American Planning Association*, 67(4), pp.456-465.
- Hannah, D.M., Demuth, S., van Lanen, H.A., Looser, U., Prudhomme, C., Rees, G., Stahl, K. and Tallaksen, L.M., 2011. Large-scale river flow archives: importance, current status and future needs. *Hydrological Processes*, 25(7), pp.1191-1200.
- Harmel, R.D., Cooper, R.J., Slade, R.M., Haney, R.L. and Arnold, J.G., 2006. Cumulative uncertainty in measured streamflow and water quality data for small watersheds. *Transactions of the ASABE*, 49(3), pp.689-701.
- Herschy, R.W., 2014. Streamflow measurement. CRC Press.
- Kelvin, W., 1883. From lecture to the Institution of Civil Engineers, London (3 May 1883), ‘Electrical Units of Measurement’, *Popular Lectures and Addresses* (1889), 1, 80–81.
- Kirchner, J.W., 2006. Getting the right answers for the right reasons: Linking measurements, analyses, and models to advance the science of hydrology. *Water Resources Research*, 42(3).
- Kruger, L.E. and Shannon, M.A., 2000. Getting to know ourselves and our places through participation in civic social assessment. *Society & Natural Resources*, 13(5), pp.461-478.

No Comments.



Kundzewicz, Z.W., 1997. Water resources for sustainable development. *Hydrological Sciences Journal*, 42(4), pp.467-480.

Lasaga, A.C., 1984. Chemical kinetics of water-rock interactions. *Journal of geophysical research: solid earth*, 89(B6), pp.4009-4025.

5

Le Coz, J., Hauet, A., Pierrefeu, G., Dramais, G. and Camenen, B., 2010. Performance of image-based velocimetry (LSPIV) applied to flash-flood discharge measurements in Mediterranean rivers. *Journal of hydrology*, 394(1-2), pp.42-52.

Le Coz J, Patalano A, Collins D, Guillén NF, García CM, Smart GM, Bind J, Chiaverini A, Le Boursicaud R, Dramais G,  
 10 Braud I. Crowdsourced data for flood hydrology: Feedback from recent citizen science projects in Argentina, France and New Zealand. *Journal of Hydrology*. 2016 Oct 1;541:766-77.

Le Boursicaud, R., Pénard, L., Hauet, A., Thollet, F. and Le Coz, J., 2016. Gauging extreme floods on YouTube: application of LSPIV to home movies for the post-event determination of stream discharges. *Hydrological Processes*, 30(1), pp.90-105.

15

Lee Rodgers, J. and Nicewander, W.A., 1988. Thirteen ways to look at the correlation coefficient. *The American Statistician*, 42(1), pp.59-66.

Mazzoleni, M., Verlaan, M., Alfonso, L., Monego, M., Norbiato, D., Ferri, M. and Solomatine, D.P., 2015. Can assimilation  
 20 of crowdsourced streamflow observations in hydrological modelling improve flood prediction?. *Hydrology & Earth System Sciences Discussions*, 12(11).

McCulloch, J.S.G., 1996. Book Review: Streamflow measurement. Reginald W. Herschy, 1995, E. and FN Spon, an imprint of Chapman and Hall, London, 524 pp., ISBN 0-419-19490-8. *Journal of Hydrology*, 176, pp.285-286.

25

Mishra, A.K. and Coulibaly, P., 2009. Developments in hydrometric network design: A review. *Reviews of Geophysics*, 47(2).

Moore, R.D. 2004a. Introduction to salt dilution gauging for streamflow measurement: Part I. Streamline Watershed  
 30 Management Bulletin 7(4):20-23.

Moore, R.D. 2004b. Introduction to salt dilution gauging for streamflow measurement Part II: Constant-rate injection. *Streamline Watershed Management Bulletin* 8(1):11-15.

No Comments.



- Moore, R.D. 2005. Introduction to salt dilution gauging for streamflow measurement Part III: Slug Injection Using Salt in Solution. Streamline Watershed Management Bulletin 8(2):1–6.
- Mulligan, M., 2013. WaterWorld: a self-parameterising, physically based model for application in data-poor but problem-rich environments globally. *Hydrology Research*, 44(5), pp.748-769.
- Muste, M., Fujita, I. and Hauet, A., 2008. Large-scale particle image velocimetry for measurements in riverine environments. *Water resources research*, 44(4).
- 10 O’Grady, M.J., Muldoon, C., Carr, D., Wan, J., Kroon, B. and O’Hare, G.M., 2016. Intelligent sensing for citizen science. *Mobile Networks and Applications*, 21(2), pp.375-385.
- Pearson, C.P., 1998. Changes to New Zealand's national hydrometric network in the 1990s. *Journal of Hydrology (New Zealand)*, pp.1-17.globally. *Hydrology Research*, 44(5), pp.748-769.
- 15 Rantz, S.E. 1982. Measurement and computation of streamflow: volume 2, computation of discharge (No. 2175). USGS.
- Sanz, S.F., Holocher-Ertl, T., Kieslinger, B., Sanz, F., Candida, G. and Silva, G., 2014. White Paper on Citizen Science in Europe, Societize Consortium.
- 20 Shrestha, S., Pradhananga, D., and Pandey, V.P., 2012. Kathmandu Valley Groundwater Outlook, Asian Institute of Technology (AIT), The Small Earth Nepal (SEN), Center of Research for Environment Energy and Water (CREEW), International Research Center for River Basin Environment - University of Yamanashi (ICRE-UY), Kathmandu, Nepal.
- 25 SonTek, 2009. FlowTracker Handheld ADV Technical Manual Firmware Version 3.7 Software Version 2.30. SonTek/YSI.
- SRTM (Shuttle Radar Topography Mission), 2000. <https://ita.cr.usgs.gov/SRTM1Arc>, Accessed 9/14/16.
- Tauro, F., Selker, J., van de Giesen, N., Abrate, T., Uijlenhoet, R., Porfiri, M., Manfreda, S., Caylor, K., Moramarco, T., Benveniste, J. and Ciruolo, G., 2018. Measurements and Observations in the XXI century (MOXXI): innovation and multi-disciplinarity to sense the hydrological cycle. *Hydrological Sciences Journal*, 63(2), pp.169-196.
- 30 Tourian, M.J., Sneeuw, N. and Bárdossy, A., 2013. A quantile function approach to discharge estimation from satellite altimetry (ENVISAT). *Water Resources Research*, 49(7), pp.4174-4186.

No Comments.



Turner, D.S. and Richter, H.E., 2011. Wet/dry mapping: using citizen scientists to monitor the extent of perennial surface flow in dryland regions. *Environmental Management*, 47(3), pp.497-505.

- 5 US Department of the Interior Bureau of Reclamation (USBR), 2001. Water measurement manual.

Van de Giesen, N., Hut, R. and Selker, J., 2014. The Trans-African Hydro-Meteorological Observatory (TAHMO). *Wiley Interdisciplinary Reviews: Water*, 1(4), pp.341-348.

- 10 Van Meerveld, H.J., Vis, M.J. and Seibert, J., 2017. Information content of stream level class data for hydrological model calibration. *Hydrology and Earth System Sciences*, 21(9), pp.4895-4905.

Wilm, H.G. and Storey, H.C., 1944. Velocity-head rod calibrated for measuring stream flow. *Civil Engineering*, 14, pp.475-476.

15

No Comments.
